# Supplementary material
Source: MDPI journal article supplement (https://www.mdpi.com/2227-9717/10/11/2186)
Supplement: s1 [file s1 › processes-1923741-supplementary.pdf]

Article

# A High-Throughput Screening Procedure (Py-Fe<sup>3+</sup>) for Enhancing Ethanol Production by *Saccharomyces cerevisiae* Using ARTP Random Mutagenesis

Wei-Yang Wang <sup>1</sup>, Shi-Hua Wu <sup>1</sup>, Yuan-Han Xie <sup>1</sup>, Miao Zhong <sup>1</sup>, Man-Li Wei <sup>1</sup>,  
Ze-Yang Li <sup>2</sup>, Xiu-Feng Long <sup>1,\*</sup> and Fu-Xing Niu <sup>1,\*</sup>

<sup>1</sup> Guangxi Key Laboratory of Green Processing of Sugar Resources, Guangxi University of Science and Technology, Liuzhou 545006, China

<sup>2</sup> Key Laboratory for Zhuang and Yao Pharmaceutical Quality Biology, Guangxi Science & Technology Normal University, Laibin 546199, China

\* Correspondence: longxiufeng@gxust.edu.cn (X.-F.L.);  
niufx3@gxust.edu.cn (F.-X.N.)

Supplement Figure S1

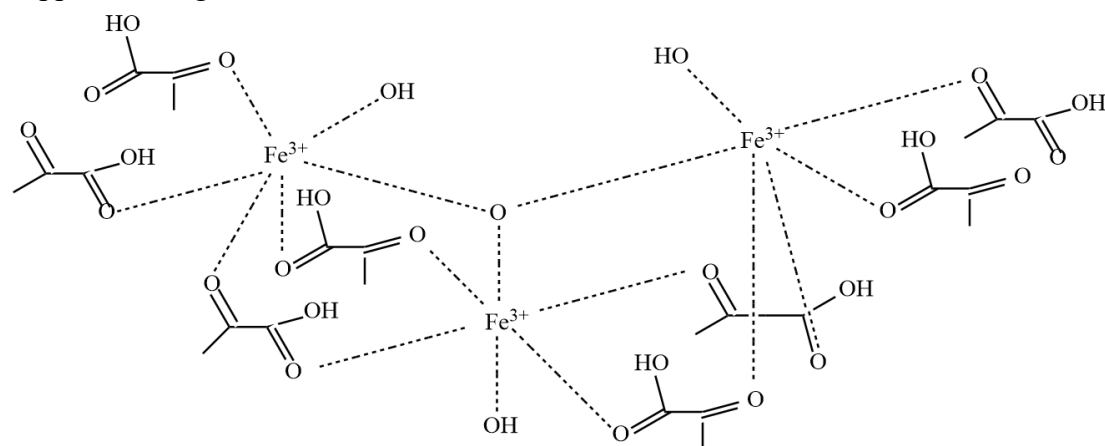

Figure S1 Structure of  $[\text{Fe}_3\text{O}(\text{CH}_3\text{COCO}_2)_6(\text{H}_2\text{O})_3]^+ [1]$

Supplement Figure S2

(A) Four *S. cerevisiae* strains, GJ2009, GJ2010, GJ2011, and GJ2012 (derived from GJ2008) with different ethanol synthesis capacities, were verified by fermentation under 190 g/L sucrose. (B) 120  $\mu\text{L}$  of these four *S. cerevisiae* strains' fermentation supernatant (Five times dilution) was transferred to a 96-well enzyme label plate, and 80  $\mu\text{L}$  1M  $\text{Fe}(\text{NO}_3)_3$  was added for reaction at room temperature for 10 min. Then the absorbance was measured at OD<sub>520</sub> nm.

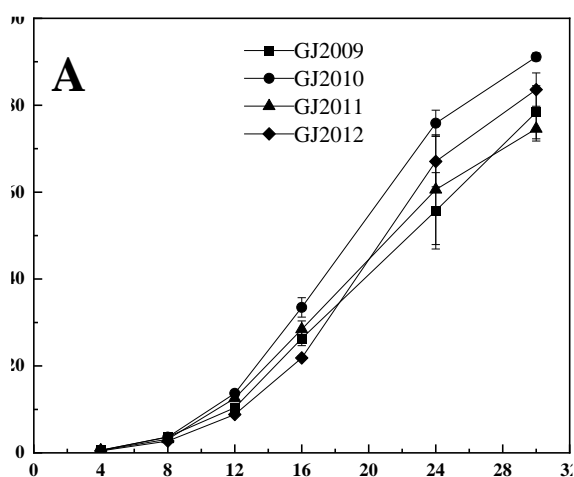

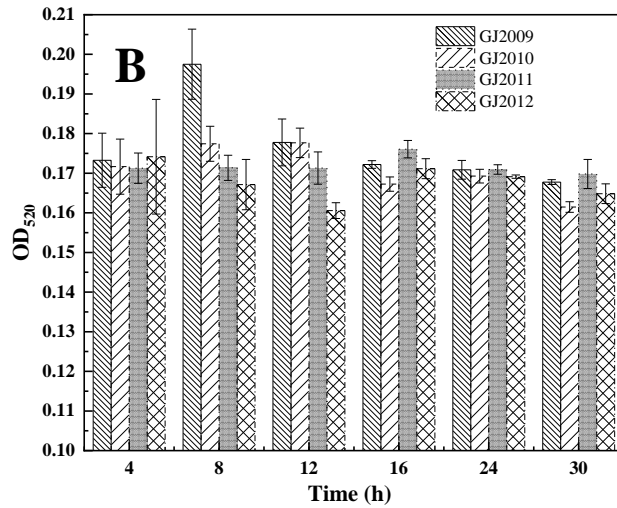

### Supplement Figure S3 ARTP mutation and adaptive evolution

After ARTP mutagenesis, the mutant bacterial library obtained was firstly cultured and subcultured in 286 g/L sucrose fermentation medium. After stable growth, the next round of mutagenesis was carried out again, and the sucrose concentration in the medium was increased until to 381 g/L.

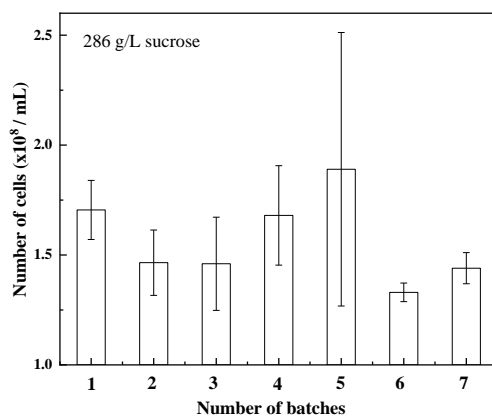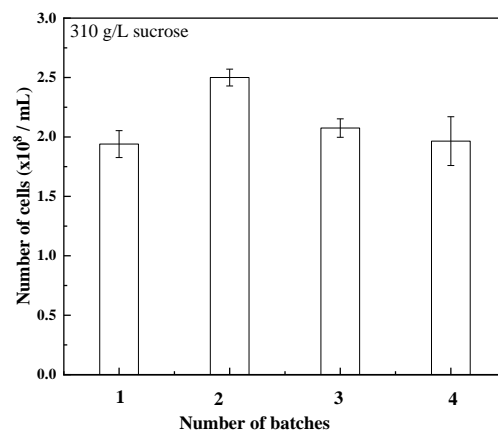

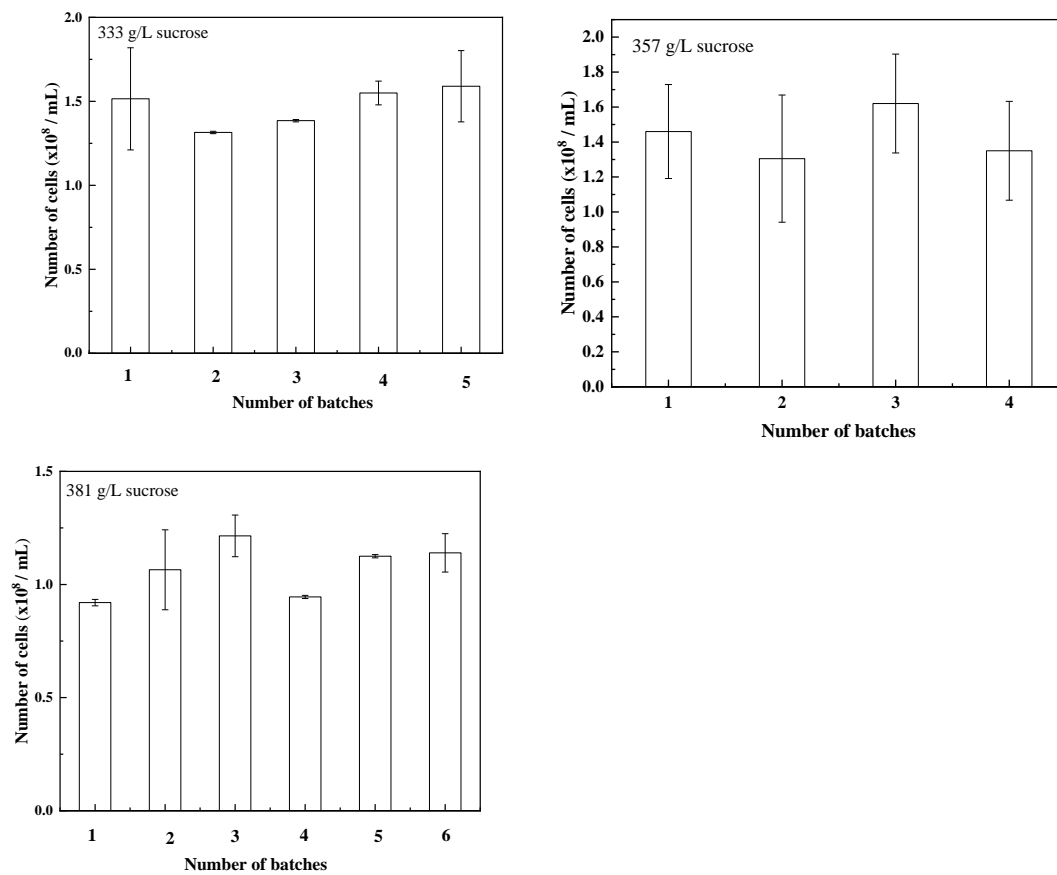

Supplement Figure S4 Comparison of cell morphology between mutant bacteria and non-mutant bacteria at sucrose concentration of 381g/L after 24 h.  
 (A) non-mutant *S. cerevisiae* (GJ2008); (B) the mutant bacterial library.

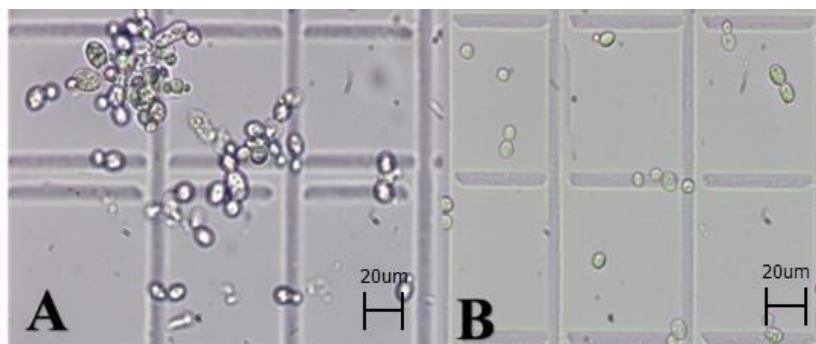

Supplement Table S1 Optimum strain fermentation and screening

| name  | Ethanol (g/L) |
|-------|---------------|
| NT-F1 | 122.69±5.02   |
| NT-F2 | 120.32±3.94   |
| NT-F3 | 119.93±3.39   |
| NT-F4 | 119.93±5.58   |
| NT-F5 | 113.62±6.69   |
| NT-F6 | 116.77±3.95   |

Those 6 strains with the lowest OD<sub>520</sub> value were selected for shaking (286 g/L sucrose), and the dominant strain NT-F1 with the highest ethanol synthesis yield was obtained.

Supplement Figure S5 Ethanol production of the selected mutants with higher OD<sub>520</sub>  
Two OD<sub>520</sub> strains (NT-FX and NT-FY) with higher values were randomly selected for fermentation from the 380 strains.

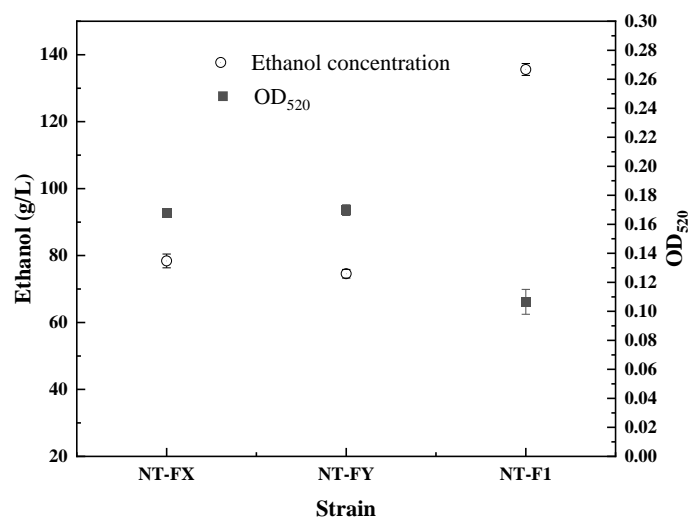

#### Reference

1. Mehrotra, R.-N.; Hasan, T. Detection and spectrophotometric determination of pyruvic acid. *Anal. Lett.* **1986**, *19*, 1713-1724. doi: 10.1080/00032718608066497
